# Supplementary material
Source: PubMed Central journal article supplement (PMC8464491)
Supplement: NIHMS1730457-supplement-Supplementary_Materials.pdf [file NIHMS1730457-supplement-Supplementary_Materials.pdf]

**Supplemental Figure S1.** Prevalence of Types of Nicotine Dependence Symptoms Experienced among JUUL and Combustible Cigarette Dual Users ( $N=235$ )

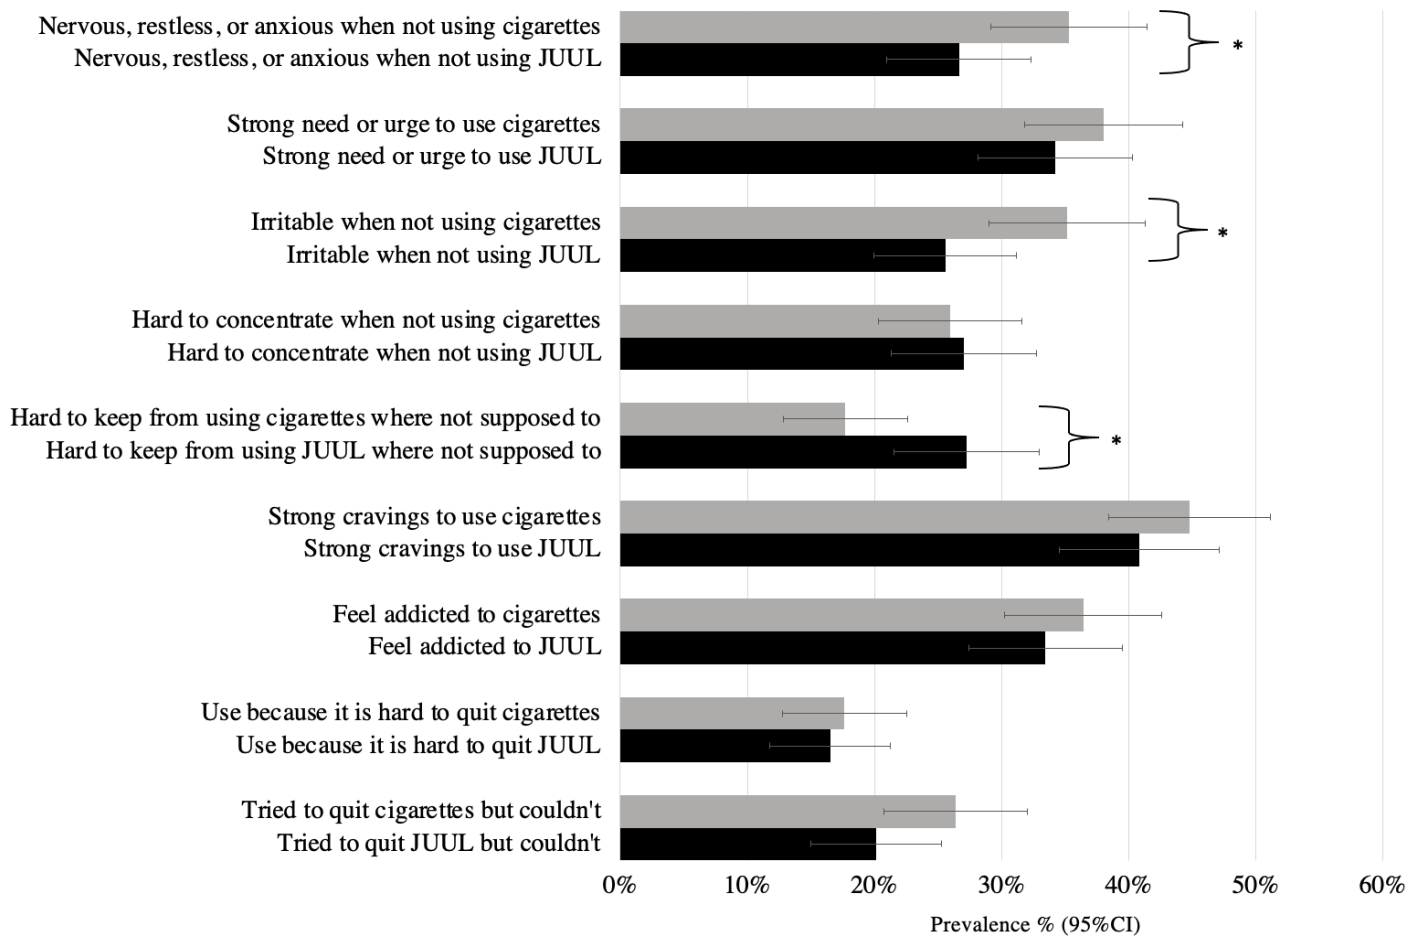

*Note.* \* Significantly different based on based on the McNemar test on paired proportions ( $p < .01$ , two-tailed).

**Supplemental Figure S2.** Mean Scores of JUUL and Cigarette Dependence Symptom Score among Dual Users

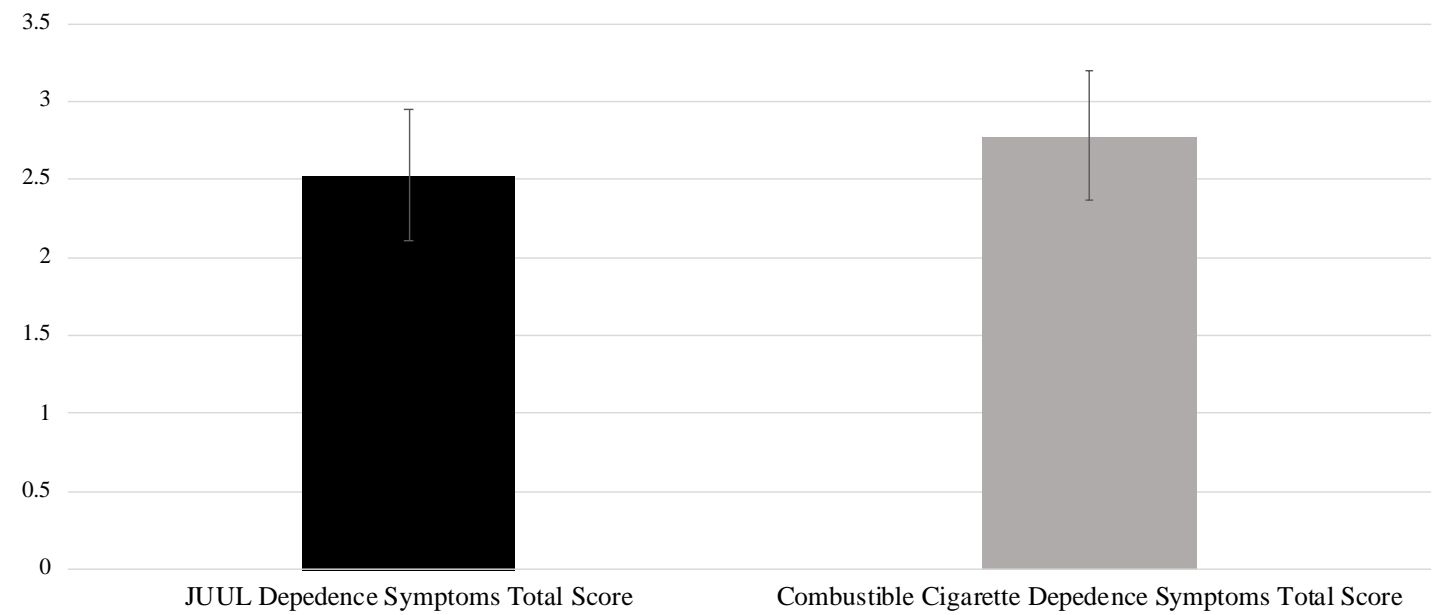

*Note.* JUUL and Cigarette dependence symptoms scores were nonsignificant among dual users.

**Supplemental Table S1.** Descriptive Statistics of Comparison Sample of Past 30-Day Combustible Cigarette Users

| Variables                                     | Sample Characteristics<br>N, Column % <sup>b</sup> |
|-----------------------------------------------|----------------------------------------------------|
| <b>Sociodemographics</b>                      |                                                    |
| Grade                                         |                                                    |
| 8 <sup>th</sup>                               | 98, 23.3%                                          |
| 10 <sup>th</sup>                              | 128, 51.7%                                         |
| 12 <sup>th</sup>                              | 211, 48.3%                                         |
| Gender                                        |                                                    |
| Female                                        | 180, 43.6%                                         |
| Male                                          | 238, 56.4%                                         |
| Race/Ethnicity                                |                                                    |
| Non-Hispanic White                            | 223, 52.3%                                         |
| Non-Hispanic Black                            | 19, 3.7%                                           |
| Hispanic                                      | 62, 16.1%                                          |
| Others <sup>d</sup>                           | 108, 27.9%                                         |
| Population Density                            |                                                    |
| Rural                                         | 174, 36.7%                                         |
| Suburban                                      | 173, 47.3%                                         |
| Large city                                    | 90, 16.0%                                          |
| Region                                        |                                                    |
| Northeast                                     | 41, 7.0%                                           |
| Midwest                                       | 111, 25.5%                                         |
| South                                         | 206, 42.4%                                         |
| West                                          | 79, 25.2%                                          |
| Parental education level                      |                                                    |
| No college degree                             | 213, 54.7%                                         |
| College degree                                | 171, 45.3%                                         |
| <b>Past 30-day substance use</b>              |                                                    |
| Combustible cigarettes                        |                                                    |
| ≤1 cigarette per day                          | 267, 60.5%                                         |
| 1-5 cigarettes per day                        | 102, 24.2%                                         |
| 1/2 pack per day                              | 28, 5.6%                                           |
| 1 pack per day                                | 18, 4.2%                                           |
| 1.5 packs per day                             | 7, 1.6%                                            |
| ≥2 packs per day                              | 15, 4.0%                                           |
| JUUL                                          |                                                    |
| No                                            | 76, 27.4%                                          |
| Yes                                           | 219, 72.6%                                         |
| Other tobacco products <sup>e</sup>           |                                                    |
| No                                            | 197, 60.6%                                         |
| Yes                                           | 119, 39.4%                                         |
| No. alcohol/cannabis/other drugs <sup>f</sup> |                                                    |
| 0                                             | 75, 16.7%                                          |
| 1                                             | 136, 30.3%                                         |
| 2                                             | 146, 34.3%                                         |
| 3                                             | 73, 18.7%                                          |

*Note.* Overall sample N= 437; participants with >1 Cigarette dependence symptoms: 220 (52.1%; unweighted N, weights %)

<sup>a</sup>Available data (Ns=295-437). <sup>b</sup>Unweighted frequency (N) and weighted percentage (%) are reported. <sup>d</sup>Other race/ethnicity includes Asian and multiracial groups. <sup>e</sup>Includes smokeless tobacco, cigars/cigarillos, and hookah tobacco. <sup>f</sup>Total number of substance classes used (alcohol, cannabis, or other drugs [inhalants, hallucinogen, LSD, cocaine, crack, heroin, opioids, barbiturate drugs, tranquilizer drugs, methamphetamine]).

**Supplemental Table S2.** Descriptive Statistics of Comparison Samples of Past 30-Day JUUL and Combustible Cigarette Use Status

| Variables                | JUUL use only<br>(N=1532)<br>N, Column % <sup>b</sup> | Cigarette use only<br>(N=221)<br>N, Column % <sup>b</sup> | Dual use<br>(N=216)<br>N, Column % <sup>b</sup> | Group<br>difference<br>P-Value |
|--------------------------|-------------------------------------------------------|-----------------------------------------------------------|-------------------------------------------------|--------------------------------|
| <b>Sociodemographics</b> |                                                       |                                                           |                                                 |                                |
| Grade                    |                                                       |                                                           |                                                 | <.001                          |
| 8 <sup>th</sup>          | 286, 17.7% <sup>2</sup>                               | 51, 25.7% <sup>1</sup>                                    | 47, 20.8% <sup>1,2</sup>                        |                                |
| 10 <sup>th</sup>         | 655, 42.4% <sup>1</sup>                               | 61, 25.0% <sup>2</sup>                                    | 67, 32.2% <sup>2</sup>                          |                                |
| 12 <sup>th</sup>         | 591, 39.9% <sup>2</sup>                               | 109, 49.3% <sup>1</sup>                                   | 102, 47.1% <sup>1,2</sup>                       |                                |
| Gender                   |                                                       |                                                           |                                                 | .02                            |
| Female                   | 757, 50.7% <sup>1</sup>                               | 88, 42.0% <sup>2</sup>                                    | 92, 45.1% <sup>1,2</sup>                        |                                |
| Male                     | 758, 49.3% <sup>2</sup>                               | 116, 58.0% <sup>1</sup>                                   | 122, 54.9% <sup>1,2</sup>                       |                                |
| Race/Ethnicity           |                                                       |                                                           |                                                 | <.001                          |
| Non-Hispanic White       | 956, 64.4% <sup>1</sup>                               | 87, 41.1% <sup>2</sup>                                    | 136, 63.7% <sup>1</sup>                         |                                |
| Non-Hispanic Black       | 84, 5.3% <sup>1</sup>                                 | 14, 5.4% <sup>1</sup>                                     | 5, 2.0% <sup>1</sup>                            |                                |
| Hispanic                 | 165, 11.3% <sup>2</sup>                               | 42, 22.5% <sup>1</sup>                                    | 20, 9.6% <sup>2</sup>                           |                                |
| Others <sup>d</sup>      | 293, 18.9% <sup>2</sup>                               | 57, 31.0% <sup>1</sup>                                    | 51, 24.7% <sup>1,2</sup>                        |                                |
| Population Density       |                                                       |                                                           |                                                 | <.001                          |
| Rural                    | 398, 24.4% <sup>2</sup>                               | 85, 33.9% <sup>1</sup>                                    | 89, 39.8% <sup>1</sup>                          |                                |
| Suburban                 | 638, 51.9% <sup>1</sup>                               | 88, 48.6% <sup>1</sup>                                    | 85, 46.1% <sup>1</sup>                          |                                |
| Large city               | 496, 23.7% <sup>1</sup>                               | 48, 17.5% <sup>2</sup>                                    | 42, 14.2% <sup>2</sup>                          |                                |
| Region                   |                                                       |                                                           |                                                 | <.001                          |
| Northeast                | 268, 15.7% <sup>1</sup>                               | 24, 7.1% <sup>2</sup>                                     | 17, 6.7% <sup>2</sup>                           |                                |
| Midwest                  | 436, 30.8% <sup>1</sup>                               | 50, 20.7% <sup>2</sup>                                    | 61, 30.6% <sup>1</sup>                          |                                |
| South                    | 619, 36.3% <sup>2</sup>                               | 106, 47.1% <sup>1</sup>                                   | 100, 37.3% <sup>2</sup>                         |                                |
| West                     | 209, 17.2% <sup>2</sup>                               | 41, 25.0% <sup>1</sup>                                    | 38, 25.5% <sup>1</sup>                          |                                |
| Parental education level |                                                       |                                                           |                                                 | <.001                          |
| No college degree        | 553, 39.4% <sup>2</sup>                               | 111, 62.7% <sup>1</sup>                                   | 102, 47.1% <sup>2</sup>                         |                                |
| College degree           | 900, 60.6% <sup>1</sup>                               | 70, 37.3% <sup>2</sup>                                    | 101, 52.9% <sup>1</sup>                         |                                |

Note. Overall sample N= 437; participants with >1 Cigarette dependence symptoms: 220 (52.1%; unweighted N, weights %)

<sup>a</sup>Available data (Ns=295-437). <sup>b</sup>Unweighted frequency (N) and weighted percentage (%) are reported. <sup>c</sup>Other race/ethnicity includes Asian and multiracial groups. <sup>d</sup>Includes smokeless tobacco, cigars/cigarillos, and hookah tobacco. <sup>e</sup>Total number of substance classes used (alcohol, cannabis, or other drugs [inhalants, hallucinogen, LSD, cocaine, crack, heroin, opioids, barbiturate drugs, tranquilizer drugs, methamphetamine]).

**Supplemental Table S3.** Relative risk estimation by log-binomial regression model for any dependence symptom

| <b>Regressors</b>                                        | <b>Any dependence symptoms</b>             |                |
|----------------------------------------------------------|--------------------------------------------|----------------|
|                                                          | <b>Risk Ratio (95% CI)<sup>a,b,c</sup></b> | <b>P-Value</b> |
| <b>Sociodemographics</b>                                 |                                            |                |
| Grade                                                    |                                            |                |
| 8 <sup>th</sup>                                          | REF                                        | --             |
| 10 <sup>th</sup>                                         | 0.74 (0.61, 0.88)                          | .001*          |
| 12 <sup>th</sup>                                         | 0.75 (0.63, 0.91)                          | .003*          |
| Female (male REF)                                        | 1.14 (1.04, 1.26)                          | .01*           |
| Race/Ethnicity                                           |                                            |                |
| Non-Hispanic White                                       | REF                                        | --             |
| Non-Hispanic Black                                       | 1.01 (0.74, 1.36)                          | .99            |
| Hispanic                                                 | 0.88 (0.72, 1.08)                          | .21            |
| Others <sup>d</sup>                                      | 0.86 (0.72, 1.04)                          | .11            |
| Population Density                                       |                                            |                |
| Rural                                                    | REF                                        | --             |
| Suburban                                                 | 0.98 (0.88, 1.10)                          | .81            |
| Large city                                               | 1.17 (1.01, 1.36)                          | .04            |
| Region                                                   |                                            |                |
| Northeast                                                | REF                                        | --             |
| Midwest                                                  | 0.92 (0.84, 1.01)                          | .09            |
| South                                                    | 0.94 (0.85, 1.03)                          | .19            |
| West                                                     |                                            | .43            |
| Parent with (vs. without) college degree                 | 1.08 (0.96, 1.21)                          | .22            |
| <b>Nicotine dependence</b>                               |                                            |                |
| Combustible cigarette dependence symptoms (Any vs. None) | 1.13 (1.02, 1.24)                          | .01*           |
| <b>Past 30-day substance use</b>                         |                                            |                |
| Other tobacco products <sup>e</sup>                      | 0.94 (0.83, 1.06)                          | .31            |
| No. alcohol/cannabis/other drugs <sup>f</sup>            |                                            |                |
| 0                                                        | REF                                        | --             |
| 1                                                        | 1.20 (0.91, 1.59)                          | .20            |
| 2                                                        | 1.42 (1.01, 2.01)                          | .04            |
| 3                                                        | 1.61 (1.14, 2.28)                          | .007*          |
| JUUL                                                     |                                            |                |
| 1-2 days                                                 | REF                                        | --             |
| 3-5 days                                                 | 1.44 (1.18, 1.77)                          | <.001*         |
| 6-9 days                                                 | 1.46 (1.18, 1.82)                          | <.001*         |
| 10-19 days                                               | 1.89 (1.54, 2.32)                          | <.001*         |
| 20 or more days                                          | 2.34 (1.99, 2.74)                          | <.001*         |

*Note.* Past 30-day JUUL users N=1748. <sup>a</sup>Multivariable log-binomial regression model for binary outcome of JUUL dependence status (any symptoms vs. none). <sup>b</sup>All regressors were simultaneously modeled consistent with the primary analysis except past 30-day combustible cigarette use for the model convergence. <sup>c</sup>Sampling weight was considered. Complex analyses were conducted using the cluster variable (astrat: Stratum for single or multiple year analysis). <sup>d</sup>Other race/ethnicity includes Asian and multiracial groups. <sup>e</sup>Includes smokeless tobacco, cigars/cigarillos, and hookah tobacco. <sup>f</sup>Total number of substance classes used (alcohol, cannabis, or other drugs [inhalants, hallucinogen, LSD, cocaine, crack, heroin, opioids, barbiturate drugs, tranquilizer drugs, methamphetamine]). \*Statistically significant after Benjamini-Hochberg correction for multiple tests to maintain study-wise false discovery rate of .05.
